# Supplementary material for: Integrative Analysis of Multi-Omics Data and Gut Microbiota Composition Reveals Prognostic Subtypes and Predicts Immunotherapy Response in Colorectal Cancer Using Machine Learning
Source: Research Square preprint supplement (doi:10.21203/rs.3.rs-5669193/v1), 2025-04-28
Supplement: Supplementary file 2 [file 3630f58533a116c38542eb0c.docx]

**Integrative Analysis of Multi-Omics Data and Gut Microbiota Composition Reveals Prognostic Subtypes and Predicts Immunotherapy Response in Colorectal Cancer Using Machine Learning**

**Jun Wang, Cong Yuan, Bo Tang, Juan Liu, Ke Pu**

# Supplementary Figures and Tables

## Supplementary Figures

**Figure S1: Analysis of microbiome composition and diversity in colorectal cancer samples.** (**A-C**) Relative abundance bar plot at the bacterial species level, comparing differences between genders in colorectal cancer samples. (**D-F**) Relative abundance bar plot at the bacterial species level, comparing differences between age groups in colorectal cancer samples. (**G-I**) Relative abundance bar plot at the bacterial species level, comparing differences between stages in colorectal cancer samples.

**Figure S2. Principal component analysis (PCA) plots of the META-COAD cohort before and after batch effect removal.** (**A**) PCA plot of the META-COAD cohort before batch effect removal, showing distinct clusters corresponding to the four independent CRC datasets (GSE17356, GSE17537, GSE72970, and GSE161158). (**B**) PCA plot of the META-COAD cohort after batch effect removal, demonstrating successful integration of the four datasets into a single cohort, as evidenced by the absence of distinct clusters.

## Supplementary Tables

**Supplementary Table 1:** Overview of Clinical Information for 274 Patients.

**Supplementary Table 2:** Detailed results of differential analysis of 53 differential bacteria.

**Supplementary Table 3:** Detailed patient clinical information and MCMLS scores in the IMvigor210 dataset.

**Supplementary Table 4:** Detailed patient clinical information and MCMLS scores in the GSE176307 dataset.

**Supplementary Table 5:** Detailed patient clinical information and MCMLS scores in the PRJEB23709 dataset.

**Supplementary Table 6:** Detailed patient clinical information and MCMLS scores in the PHS00452 dataset.

**Supplementary Table 7:** Detailed patient clinical information and MCMLS scores in the GSE91061 dataset.

**Supplementary Table 8:** Detailed patient clinical information and MCMLS scores in the GSE100797 dataset.
